# Supplementary material for: Chromosome-scale assembly comparison of the Korean Reference Genome KOREF from PromethION and PacBio with Hi-C mapping information
Source: PubMed Central journal article supplement (PMC6889754; doi:10.1093/gigascience/giz125), 2019-12-03
Supplement: giz125_giga-d-19-00240_original_submission.pdf [file giz125_giga-d-19-00240_original_submission.pdf]

# GigaScience

## Chromosome-scale assembly comparison of the Korean Reference Genome KOREF from PromethION and PacBio with Hi-C mapping information --Manuscript Draft--

|                                                      |                                                                                                                                                                                                                                                                                                                                                                                                                                                                                                                                                                                                                                                                                                                                                                                                                                                                                                                                                                                                                                                                                                                                                                                                                                                                                                                                                                                                                                                                                                                                                                                                                                                                                          |               |
|------------------------------------------------------|------------------------------------------------------------------------------------------------------------------------------------------------------------------------------------------------------------------------------------------------------------------------------------------------------------------------------------------------------------------------------------------------------------------------------------------------------------------------------------------------------------------------------------------------------------------------------------------------------------------------------------------------------------------------------------------------------------------------------------------------------------------------------------------------------------------------------------------------------------------------------------------------------------------------------------------------------------------------------------------------------------------------------------------------------------------------------------------------------------------------------------------------------------------------------------------------------------------------------------------------------------------------------------------------------------------------------------------------------------------------------------------------------------------------------------------------------------------------------------------------------------------------------------------------------------------------------------------------------------------------------------------------------------------------------------------|---------------|
| <b>Manuscript Number:</b>                            | GIGA-D-19-00240                                                                                                                                                                                                                                                                                                                                                                                                                                                                                                                                                                                                                                                                                                                                                                                                                                                                                                                                                                                                                                                                                                                                                                                                                                                                                                                                                                                                                                                                                                                                                                                                                                                                          |               |
| <b>Full Title:</b>                                   | Chromosome-scale assembly comparison of the Korean Reference Genome KOREF from PromethION and PacBio with Hi-C mapping information                                                                                                                                                                                                                                                                                                                                                                                                                                                                                                                                                                                                                                                                                                                                                                                                                                                                                                                                                                                                                                                                                                                                                                                                                                                                                                                                                                                                                                                                                                                                                       |               |
| <b>Article Type:</b>                                 | Data Note                                                                                                                                                                                                                                                                                                                                                                                                                                                                                                                                                                                                                                                                                                                                                                                                                                                                                                                                                                                                                                                                                                                                                                                                                                                                                                                                                                                                                                                                                                                                                                                                                                                                                |               |
| <b>Funding Information:</b>                          | Ulsan National Institute of Science and Technology (1.190007.01)                                                                                                                                                                                                                                                                                                                                                                                                                                                                                                                                                                                                                                                                                                                                                                                                                                                                                                                                                                                                                                                                                                                                                                                                                                                                                                                                                                                                                                                                                                                                                                                                                         | Dr. Jong Bhak |
|                                                      | Ulsan National Institute of Science and Technology (1.190033.01)                                                                                                                                                                                                                                                                                                                                                                                                                                                                                                                                                                                                                                                                                                                                                                                                                                                                                                                                                                                                                                                                                                                                                                                                                                                                                                                                                                                                                                                                                                                                                                                                                         | Dr. Jong Bhak |
| <b>Abstract:</b>                                     | <p><b>Background</b></p> <p>Long DNA reads produced by single molecule and pore-based sequencers are more suitable for assembly and structural variation discovery than short read DNA fragments. For de novo assembly, PacBio and Oxford Nanopore Technologies (ONT) are favorite options. However, PacBio's SMRT sequencing is expensive for a full human genome assembly and costs over 40,000 USD for 30x coverage as of 2019. ONT PromethION sequencing, on the other hand, is one-twelfth the price of PacBio for the same coverage. This study aimed to compare the cost-effectiveness of ONT PromethION and PacBio's SMRT sequencing in relation to the quality.</p> <p><b>Findings</b></p> <p>We performed whole genome de novo assemblies and comparison to construct an improved version of KOREF, the Korean reference genome, using sequencing data produced by PromethION and PacBio. With PromethION, an assembly using sequenced reads with 64x coverage (193 Gb, 3 flowcell sequencing) resulted in 3,725 contigs with N50s of 16.7 Mbp and a total genome length of 2.8 Gbp. It was comparable to a KOREF assembly constructed using PacBio at 62x coverage (188 Gbp, 2,695 contigs and N50s of 17.9 Mbp). When we applied Hi-C-derived long-range mapping data, an even higher quality assembly for the 64x coverage was achieved, resulting in 3,179 scaffolds with an N50 of 56.4 Mbp.</p> <p><b>Conclusion</b></p> <p>The pore-based PromethION approach provides a good quality chromosome-scale human genome assembly at a low cost with long maximum contig and scaffold lengths and is more cost-effective than PacBio at comparable quality measurements.</p> |               |
| <b>Corresponding Author:</b>                         | Jong Hwa Bhak, Ph.D.<br>UNIST<br>Ulsan, Ulsan KOREA, REPUBLIC OF                                                                                                                                                                                                                                                                                                                                                                                                                                                                                                                                                                                                                                                                                                                                                                                                                                                                                                                                                                                                                                                                                                                                                                                                                                                                                                                                                                                                                                                                                                                                                                                                                         |               |
| <b>Corresponding Author Secondary Information:</b>   |                                                                                                                                                                                                                                                                                                                                                                                                                                                                                                                                                                                                                                                                                                                                                                                                                                                                                                                                                                                                                                                                                                                                                                                                                                                                                                                                                                                                                                                                                                                                                                                                                                                                                          |               |
| <b>Corresponding Author's Institution:</b>           | UNIST                                                                                                                                                                                                                                                                                                                                                                                                                                                                                                                                                                                                                                                                                                                                                                                                                                                                                                                                                                                                                                                                                                                                                                                                                                                                                                                                                                                                                                                                                                                                                                                                                                                                                    |               |
| <b>Corresponding Author's Secondary Institution:</b> |                                                                                                                                                                                                                                                                                                                                                                                                                                                                                                                                                                                                                                                                                                                                                                                                                                                                                                                                                                                                                                                                                                                                                                                                                                                                                                                                                                                                                                                                                                                                                                                                                                                                                          |               |
| <b>First Author:</b>                                 | Hui-Su Kim, Ph.D.                                                                                                                                                                                                                                                                                                                                                                                                                                                                                                                                                                                                                                                                                                                                                                                                                                                                                                                                                                                                                                                                                                                                                                                                                                                                                                                                                                                                                                                                                                                                                                                                                                                                        |               |
| <b>First Author Secondary Information:</b>           |                                                                                                                                                                                                                                                                                                                                                                                                                                                                                                                                                                                                                                                                                                                                                                                                                                                                                                                                                                                                                                                                                                                                                                                                                                                                                                                                                                                                                                                                                                                                                                                                                                                                                          |               |
| <b>Order of Authors:</b>                             | Hui-Su Kim, Ph.D.                                                                                                                                                                                                                                                                                                                                                                                                                                                                                                                                                                                                                                                                                                                                                                                                                                                                                                                                                                                                                                                                                                                                                                                                                                                                                                                                                                                                                                                                                                                                                                                                                                                                        |               |
|                                                      | Sungwon Jeon, B.S.                                                                                                                                                                                                                                                                                                                                                                                                                                                                                                                                                                                                                                                                                                                                                                                                                                                                                                                                                                                                                                                                                                                                                                                                                                                                                                                                                                                                                                                                                                                                                                                                                                                                       |               |

|                                                                                                                                                                                                                                                                                                                                                                                                                                                                                                                                     |                      |
|-------------------------------------------------------------------------------------------------------------------------------------------------------------------------------------------------------------------------------------------------------------------------------------------------------------------------------------------------------------------------------------------------------------------------------------------------------------------------------------------------------------------------------------|----------------------|
|                                                                                                                                                                                                                                                                                                                                                                                                                                                                                                                                     | Changjae Kim, Ph.D.  |
|                                                                                                                                                                                                                                                                                                                                                                                                                                                                                                                                     | Yeon Kyung Kim, M.S. |
|                                                                                                                                                                                                                                                                                                                                                                                                                                                                                                                                     | Yun Sung Cho, Ph.D.  |
|                                                                                                                                                                                                                                                                                                                                                                                                                                                                                                                                     | Jungeun Kim, Ph.D.   |
|                                                                                                                                                                                                                                                                                                                                                                                                                                                                                                                                     | Asta Blazyte, B.S.   |
|                                                                                                                                                                                                                                                                                                                                                                                                                                                                                                                                     | Andrea Manica, Ph.D. |
|                                                                                                                                                                                                                                                                                                                                                                                                                                                                                                                                     | Semin Lee, Ph.D.     |
|                                                                                                                                                                                                                                                                                                                                                                                                                                                                                                                                     | Jong Bhak, Ph.D.     |
| <b>Order of Authors Secondary Information:</b>                                                                                                                                                                                                                                                                                                                                                                                                                                                                                      |                      |
| <b>Additional Information:</b>                                                                                                                                                                                                                                                                                                                                                                                                                                                                                                      |                      |
| <b>Question</b>                                                                                                                                                                                                                                                                                                                                                                                                                                                                                                                     | <b>Response</b>      |
| Are you submitting this manuscript to a special series or article collection?                                                                                                                                                                                                                                                                                                                                                                                                                                                       | No                   |
| <p><b>Experimental design and statistics</b></p> <p>Full details of the experimental design and statistical methods used should be given in the Methods section, as detailed in our <a href="#">Minimum Standards Reporting Checklist</a>. Information essential to interpreting the data presented should be made available in the figure legends.</p> <p>Have you included all the information requested in your manuscript?</p>                                                                                                  | Yes                  |
| <p><b>Resources</b></p> <p>A description of all resources used, including antibodies, cell lines, animals and software tools, with enough information to allow them to be uniquely identified, should be included in the Methods section. Authors are strongly encouraged to cite <a href="#">Research Resource Identifiers</a> (RRIDs) for antibodies, model organisms and tools, where possible.</p> <p>Have you included the information requested as detailed in our <a href="#">Minimum Standards Reporting Checklist</a>?</p> | Yes                  |
| <b>Availability of data and materials</b>                                                                                                                                                                                                                                                                                                                                                                                                                                                                                           | Yes                  |

All datasets and code on which the conclusions of the paper rely must be either included in your submission or deposited in [publicly available repositories](#) (where available and ethically appropriate), referencing such data using a unique identifier in the references and in the “Availability of Data and Materials” section of your manuscript.

Have you have met the above requirement as detailed in our [Minimum Standards Reporting Checklist](#)?

[Click here to view linked References](#)

1 **Chromosome-scale assembly comparison of the Korean Reference Genome**  
2 **KOREF from PromethION and PacBio with Hi-C mapping information**

3

4 Hui-Su Kim<sup>1</sup>, Sungwon Jeon<sup>1,2</sup>, Changjae Kim<sup>1</sup>, Yeon Kyung Kim<sup>1</sup>, Yun Sung Cho<sup>3</sup>, Jungeun  
5 Kim<sup>5</sup>, Asta Blazyte<sup>1</sup>, Andrea Manica<sup>4</sup>, Semin Lee<sup>1,2\*</sup>, Jong Bhak<sup>1,2,3,5\*</sup>

6

7 <sup>1</sup>KOGIC, Ulsan National Institute of Science and Technology (UNIST), Ulsan 44919, Republic  
8 of Korea

9 <sup>2</sup>Department of Biomedical Engineering, School of Life Sciences, UNIST, Ulsan 44919,  
10 Republic of Korea

11 <sup>3</sup>Clinomics Inc., Ulsan 44919, Republic of Korea

12 <sup>4</sup>Department of Zoology, Cambridge, University, Cambridge, UK

13 <sup>5</sup>Personal Genomics Institute, Genome Research Foundation, Cheongju 28160, Republic of  
14 Korea

15

16

17 **\*Correspondence author:**

18 Name: Jong Bhak, Ph.D.

19 Address: #110-303, Ulsan National Institute of Science and Technology, UNIST-gil 50,  
20 Eonyang-eup, Ulju-gun, Ulsan 44919, Republic of Korea

1 Phone: (+82) 10-4644-6754

2 Email: jongbhak@genomics.org, ORCID: 0000-0002-4228-1299

3 Name: Semin Lee, Ph.D.

4 Address: #110-302, Ulsan National Institute of Science and Technology, UNIST-gil 50,

5 Eonyang-eup, Ulju-gun, Ulsan 44919, Republic of Korea

6 Phone: (+82) 52-217-2663

7 Email: seminlee@gmail.com, ORCID: 0000-0002-9015-6046

8

# 1 **Abstract**

2 **Background:** Long DNA reads produced by single molecule and pore-based sequencers are  
3 more suitable for assembly and structural variation discovery than short read DNA fragments.  
4 For *de novo* assembly, PacBio and Oxford Nanopore Technologies (ONT) are favorite options.  
5 However, PacBio's SMRT sequencing is expensive for a full human genome assembly and  
6 costs over 40,000 USD for 30× coverage as of 2019. ONT PromethION sequencing, on the  
7 other hand, is one-twelfth the price of PacBio for the same coverage. This study aimed to  
8 compare the cost-effectiveness of ONT PromethION and PacBio's SMRT sequencing in  
9 relation to the quality.

10 **Findings:** We performed whole genome *de novo* assemblies and comparison to construct an  
11 improved version of KOREF, the Korean reference genome, using sequencing data produced  
12 by PromethION and PacBio. With PromethION, an assembly using sequenced reads with 64×  
13 coverage (193 Gb, 3 flowcell sequencing) resulted in 3,725 contigs with N50s of 16.7 Mbp and  
14 a total genome length of 2.8 Gbp. It was comparable to a KOREF assembly constructed using  
15 PacBio at 62× coverage (188 Gbp, 2,695 contigs and N50s of 17.9 Mbp). When we applied Hi-  
16 C-derived long-range mapping data, an even higher quality assembly for the 64× coverage was  
17 achieved, resulting in 3,179 scaffolds with an N50 of 56.4 Mbp.

18 **Conclusion:** The pore-based PromethION approach provides a good quality chromosome-  
19 scale human genome assembly at a low cost with long maximum contig and scaffold lengths  
20 and is more cost-effective than PacBio at comparable quality measurements.

21

22 **Keywords:** Korean reference genome; KOREF, PromethION; Hi-C; nanopore sequencing,  
23 single molecule sequencing

## 1 **Data Description**

2 Next-generation sequencing (NGS) is a set of powerful sequencing technologies and a recent  
3 trend in genomics is to use cost-effective long DNA reads for assembly and structural variation  
4 discovery using single molecule sequencing methods. Oxford Nanopore Technologies (ONT)  
5 and PacBio platforms have advantages of a short run time and long read lengths over short  
6 fragmented reads by Illumina [1, 2]. Unfortunately, both methods share high base-calling error  
7 rates [3, 4]. However, bioinformatics pipelines for self-error correction and/or polishing  
8 sequences with short reads have become an effective option, and the overall accuracy of long  
9 read based assemblies is approaching what is required to be a viable option for personal  
10 reference genome construction [5]. Despite its excellent performance, PacBio's SMRT  
11 sequencing is expensive for the effective coverage required for a full human genome assembly,  
12 costing over 40,000 USD for 30× coverage (with 15 SMRT cells; from an estimated 6 Gbp raw  
13 reads production per SMRT cell) as of 2019 [6, 7, 8]. On the other hand, the nanopore based  
14 single molecule, long read platform, PromethION from ONT is highly cost-effective at one-  
15 twelfth the price of PacBio's for the same read amount, with an advantage of even longer  
16 average and maximum read lengths [9]. Although the two methods share some similarity, they  
17 are fundamentally different in that ONT uses a minimal amount of reagents with small form  
18 factor devices, and can be a promising future technology for a very broad scope of applications  
19 given its advantageous size and cost.

20 In this study, we performed benchmark tests of PromethION and PacBio with low and  
21 high coverages of sequencing data and investigated the advantages of pairing these long read  
22 technologies with very long-range chromosome mapping information by Hi-C, using the  
23 already existing high-quality Korean reference genome, KOREF, as a benchmark [10].

24

## 1 **Whole genome sequencing by ONT PromethION R9.4.1 platform**

2 Human KOREF cell lines (<http://koref.net>) were cultured at 37°C in 5% CO<sub>2</sub> in RPMI-1640  
3 medium with 10% heat-inactivated fetal bovine serum. DNA was extracted from cells using  
4 the DNeasy Blood & Tissue kit (Qiagen). The KOREF cells ( $5 \times 10^6$ ) were centrifuged at 300  
5 g for 5 min; the pelleted cells were suspended in 200 µL of PBS and DNA was extracted  
6 according to the manufacturer's instructions. To preserve large-sized DNA and purify DNA  
7 fragments, we used Genomic DNA Clean & Concentrator kit (Zymo). The DNA quality and  
8 size were assessed by running 1 µL of purified DNA on the Bioanalyzer system (Agilent).  
9 Concentration of DNA was assessed using the dsDNA BR assay on a Qubit fluorometer  
10 (Thermo Fisher).

11 DNA repair (NEBNext FFPE DNA Repair Mix, NEB M6630) and end-prep  
12 (NEBNext End Repair/dA-tailing, NEB E7546) were performed using 1 µg human genomic  
13 DNA. The mixture of 1 µL DNA CS, 3.5 µL FFPE Repair Buffer, 2 µL FFPE DNA Repair  
14 Mix, 3.5 µL Ultra II End-prep reaction buffer, and 3 µL Ultra II End-prep enzyme mix was  
15 added to 47 µL DNA sample. The final mixture was incubated at 20°C for 5 min and then at  
16 65°C for 5 min, cleaned up using 60 µL AMPure XP beads, incubated on Hula mixer for 5 min  
17 at room temperature, and washed twice with 200 µL fresh 70% ethanol. The pellet was allowed  
18 to dry for 30 s, and then DNA was eluted in 61 µL of nuclease-free water. An aliquot of 1 µL  
19 was quantified by Qubit to ensure  $\geq 1$  µg DNA was retained.

20 Adaptor ligation was performed by adding 5 µL of Adaptor Mix (AMX, SQK-LSK109  
21 Ligation Sequencing Kit 1D, Oxford Nanopore Technologies (ONT)), 25 µL Ligation Buffer  
22 (LNB, SQK-LSK109), and 10 µL NEBNext Quick T4 DNA Ligase (NEB, E6056) to 60 µL  
23 bead cleaned-up DNA, followed by gentle mixing and incubation for 10 min at room  
24 temperature.



1           The adaptor-ligated DNA was cleaned up by adding 40  $\mu$ L of AMPure XP beads,  
2 incubating for 5 min at room temperature and re-suspending the pellet twice in 250  $\mu$ L L  
3 Fragment Buffer (LFB, SQK-LSK109). The purified ligated DNA was re-suspended in 25  $\mu$ L  
4 of Elution Buffer (ELB, SQK-LSK109), incubated for 10 min at room temperature, followed  
5 by pelleting the beads, and transferring the supernatant (pre-sequencing mix or PSM) to a new  
6 Eppendorf Lobind tube. A 1- $\mu$ L aliquot was quantified by Qubit to ensure  $\geq$  500 ng DNA was  
7 retained.

8           To load the library, 75  $\mu$ L of Sequencing Buffer (SQB, SQK-LSK109) was mixed with  
9 51  $\mu$ L of Loading Beads (LB, SQK-LSK109) and this mixture was added to 24  $\mu$ L DNA library.  
10 This library was mixed by pipetting slowly and 150  $\mu$ L of sample was loaded through the inlet  
11 port.

12

### 13 **Whole genome sequencing by PacBio Sequel platform**

14 Genomic DNA was extracted from human KOREF blood samples using QIAGEN Blood &  
15 Cell Culture DNA Kit (cat no 13323). A total of 5  $\mu$ g of each sample was used as input for  
16 library preparation. The SMRTbell library was constructed using SMRTbell® Express  
17 Template Preparation Kit (101-357-000). Using the BluePippin Size selection system we  
18 removed the small fragments for large-insert library. After sequencing primer v4 was annealed  
19 to the SMRTbell template, DNA polymerase was bound to the complex (Sequel Binding kit  
20 2.0). We purified the complex using AMPure Purification to remove excess primer and  
21 polymerase prior to sequencing. The SMRTbell library was sequenced using SMRT cells  
22 (Pacific Biosciences) using Sequel Sequencing Kit v2.1 and 10 h movies were captured for  
23 each SMRT Cell 1M v2 using the Sequel (Pacific Biosciences) sequencing platform.

1

## 2 **Short read sequencing by Illumina HiSeq**

3 Short paired-end raw reads using Illumina HiSeq 2000 platform were acquired from a previous  
4 study, accession no. SRR2204706 (<ftp://ftp.sra.ebi.ac.uk/vol1/srr/SRR220/006/SRR2204706>).

5

## 6 **Hi-C chromosome conformation captured reads sequencing**

7 Long distance Hi-C chromosome conformation capture data were generated using the Arima-  
8 HiC kit (A160105 v01), and double restriction enzymes were used for chromatin digestion. To  
9 prepare KOREF cell line samples for Hi-C analysis, cells were harvested and cross-linked as  
10 instructed by the manufacturer. One million cross-linked cells were used as input in the Hi-C  
11 protocol. Briefly, chromatin from cross-linked cells or nuclei was solubilized, and then digested  
12 using restriction enzymes A1 and A2. The digested ends were then labeled using a biotinylated  
13 nucleotide, and ends were ligated to create ligation products. Ligation products were purified,  
14 fragmented, and selected by size using AMPure XP Beads. Biotinylated fragments were then  
15 enriched using Enrichment beads, and Illumina-compatible sequencing libraries were  
16 constructed on End Repair, dA-tailing, and Adaptor Ligation using a modified workflow of the  
17 Hyper Prep kit (KAPA Biosystems, Inc.). The bead-bound library was then amplified, and  
18 amplicons were purified using AMPure XP beads and subjected to deep sequencing.

19

## 20 **Short and long sequence reads processing**

21 A total of 144 Gbp of short paired-end DNA raw reads were obtained from SRA2204706.  
22 Adapter sequences were trimmed from sequenced raw reads using Trimmomatic v0.36 [11]

1 (ILLUMINACLIP:2:30:10 LEADING:5 TRAILING:5 SLIDINGWINDOW:4:20  
2 HEADCROP:15 MINLEN:60) (Trimmomatic, RRID:SCR\_011848), and screening for vectors  
3 and microbial contaminants were performed using customized database from Refseq. After  
4 preprocessing, a total of 137 Gbp cleaned reads were obtained.

5 A total of 80.7 Gbp and 193 Gbp raw reads (27× and 64× coverage) were obtained as  
6 a result of PromethION nanopore sequencing using one and three flowcells. Removing adapter  
7 sequences from the raw reads was performed using Porechop v0.2.4 (Porechop,  
8 RRID:SCR\_016967) [12]. We also acquired 92.2 Gbp and 187.9 Gbp raw reads from PacBio  
9 Sequel sequencing resulting in 30× and 62× coverage (Table 1).

10

### 11 **Long-read sequence based *de novo* genome assemblies**

12 *De novo* assemblies for the 27× and 64× PromethION raw reads were performed using wtdbg2  
13 v2.3 (WTDBG, RRID:SCR\_017225) [13]. To compare the accuracy, two sets of raw reads with  
14 30× and 62× coverage of PacBio Sequel were also used employing the same assembler.  
15 Parameters for the assembler were set optimally for each sequencing platform with multiple  
16 trials ([https://github.com/macarima/KOREF\\_PromethION\\_paper](https://github.com/macarima/KOREF_PromethION_paper)). For self-error correction  
17 with long reads, we generated consensus sequences using Racon v1.3.2 [14]. To improve the  
18 accuracy of assemblies, polishing consensus sequences with 48.2× coverage short reads was  
19 performed using Pilon v1.23 (Pilon, RRID:SCR\_014731) [15]. To assess the completeness of  
20 the long-read genome assemblies, BUSCO v3.0.2 (BUSCO, RRID:SCR\_015008) [16] with the  
21 default AUGUSTUS model for human was used to locate the presence and absence of 4,104  
22 single copy orthologous genes from mammalian OrthoDB v9.

1 For constructing chromosome-scale assemblies for the PromethION long-reads data,  
2 map assembly with Hi-C reads was performed using SALSA2 v2.2 [17]. Duplicated Hi-C reads  
3 were removed using clumpify.sh program from BBTools suite v38.32 (Bestus Bioinformaticus  
4 Tools, RRID:SCR\_016968) [18]. Mapping Hi-C reads to the assembled genome was conducted  
5 using the pipeline provided by Arima-Genomics  
6 ([https://github.com/ArimaGenomics/mapping\\_pipeline](https://github.com/ArimaGenomics/mapping_pipeline)).

7 Long read assemblies from 27× and 64× PromethION sequencing yielded total  
8 assembly sizes of 2,757 Mbp and 2,827 Mbp, with scaffold N50s of 7.6 Mbp and 16.7 Mbp,  
9 respectively (Table 2). Assemblies from PacBio sequencing at 30× and 62× coverage yielded  
10 the total assembly sizes of 2,800 Mbp and 2,815 Mbp, with scaffold N50s of 11.1 Mbp and  
11 17.9 Mbp, respectively. Adding Hi-C reads to assemblies led to 3.4- to 4.3-fold increase in the  
12 scaffold N50 lengths of PromethION (32.7 Mbp for 27× coverage and 56.4 Mbp for 64×  
13 coverage). For the PacBio assemblies, 2.2- to 3.3-fold increase was achieved for the scaffold  
14 N50 lengths (38.1 Mbp for 30× coverage and 59.3 Mbp for 62× coverage). The longest scaffold  
15 from both PromethION and PacBio assemblies with Hi-C was two times the length of the  
16 assemblies without Hi-C.

## 17

### 18 **Comparison between PromethION and PacBio assemblies**

19 The comparison between PromethION and PacBio assemblies without Hi-C mapping  
20 information using sequenced reads at 64× coverage showed comparable quality. In terms of  
21 N50, the PromethION assembly at 64× coverage yielded 1.5-fold and 0.93-fold longer N50s  
22 compared with the PacBio assemblies at 30× and 62× coverage, respectively (Figure 1a). When  
23 we compared the longest contigs, the PromethION assembly at 64× coverage yielded 1.7-fold  
24 and 1.1-fold length increase compared with the PacBio assemblies at 30× and 62× coverage,

1 respectively (Figure 1b). Comparing the number of scaffolds, PacBio assembly at 30× coverage  
2 showed the fewest (2,443) compared with that of PromethION assembly at 64× coverage  
3 (3,725).

4 When Hi-C mapping information was added to the assembly construction, the  
5 PromethION assembly at 64× coverage showed the best statistics as N50s of 56.4 Mbp and  
6 the longest scaffold length of 175.2 Mbp. The PromethION assembly at 27× coverage with  
7 Hi-C mapping information yielded 32.7 Mbp for N50s, which was comparable to both 30×  
8 and 62× coverage PacBio assemblies with Hi-C; 0.85-fold and 0.55-fold for N50s,  
9 respectively (Table 2).

10 When we compared assessment results from BUSCO, all the assemblies that had been  
11 polished with short reads showed good quality; around 92% completed orthologous genes  
12 with less than 1.1% completed and duplicated orthologous genes. Comparing the accuracy of  
13 the assemblies to the single assembly of KOREF (KOREF\_S), which is the current standard,  
14 both showed around 99.8% accuracy (Table 3). The accuracy comparison was performed  
15 using assess\_assembly program from Pomoxis [19].

16

## 17 **Conclusions**

18 We generated high-quality assemblies of the Korean reference genome, KOREF, using ONT's  
19 PromethION long-reads accompanied with Hi-C mapping information and compared them  
20 against PacBio sequencing and assemblies of the same sample. Comparing the results from the  
21 PromethION 64× sequencing to the PacBio 62× sequencing, we found that the former provided  
22 high contiguity and completeness at one-twelfth the cost of PacBio. Results from just 27×  
23 PromethION sequencing combined with Hi-C mapping information were also comparable to

1 the 30× coverage PacBio sequencing data. Therefore, to generate a chromosome-scale  
2 assembly with a long-read technology, at present, the ONT's PromethION sequencing is a good  
3 alternative to PacBio's, owing to its quality and cost-effectiveness. Simple pore-based long  
4 read sequencing has potential to dramatically improve sequencing and subsequent  
5 bioinformatics analysis for personal genome projects and cancer genome analyses where *de*  
6 *novo* assemblies are necessary for structural and copy number variations that cannot be detected  
7 easily by conventional short read only methods.

8

#### 9 **Availability of supporting data**

10 Raw long-read sequencing data from PromethION and PacBio is available at NCBI genbank  
11 under the project accession number PRJNA549351. All genome assemblies of KOREF are  
12 available at KOREF website (<http://koref.net>).

13

#### 14 **Abbreviations**

15 BUSCO: Benchmarking Universal Single-Copy Orthologs; PacBio: Pacific Biosciences;  
16 SMRT: single-molecule real-time

17

#### 18 **Competing interests**

19

20 Y.S.C. is an employee, and J.B. is the CEO of Clinomics Inc. J.B. and Y.S.C. have an equity

1 interest in the company. All other coauthors have no conflicts of interest to declare.

2

### 3 **Funding**

4 This work was supported by U-K BRAND Research Fund (1.190007.01) of UNIST; Research  
5 Project Funded by Ulsan City Research Fund (1.190033.01) of UNIST and Clinomics internal  
6 funding for KOREF sequencing using PromethION machine.

7

1 **Figure Legends**

2

3 **Figure 1.** Comparison of N50s and the longest contig/scaffold lengths for PromethION and  
4 PacBio assemblies of KOREF

5



## 1 **References**

- 2 1. Mccarthy A. Third generation DNA sequencing: Pacific biosciences' single molecule  
3 real time technology. Chem Biol [Internet]. Elsevier Ltd; 2010;17:675–6.
- 4 2. Laver T, Harrison J, O'Neill PA, Moore K, Farbos A, Paszkiewicz K, et al. Assessing  
5 the performance of the Oxford Nanopore Technologies MinION. Biomol Detect  
6 Quantif [Internet]. Elsevier GmbH; 2015;3:1–8.
- 7 3. Chin C-S, Alexander DH, Marks P, Klammer AA, Drake J, Heiner C, et al. Nonhybrid,  
8 finished microbial genome assemblies from long-read SMRT sequencing data. Nat  
9 Methods [Internet]. 2013;10:563–9.
- 10 4. Laver T, Harrison J, O'Neill PA, Moore K, Farbos A, Paszkiewicz K, et al. Assessing  
11 the performance of the Oxford Nanopore Technologies MinION. Biomol Detect  
12 Quantif [Internet]. Elsevier GmbH; 2015;3:1–8.
- 13 5. Fu S, Wang A, Au KF. A comparative evaluation of hybrid error correction methods  
14 for error-prone long reads. Genome Biol [Internet]. Genome Biology; 2019;20:1–17.
- 15 6. Desk R. Review article. Toenail onychomycosis: an important global disease burden.  
16 [Internet]. N. Engl. J. Med. 2005. p. 1–4.
- 17 7. University of Washington PacBio Sequencing Services. Available from:  
18 <https://pacbio.gs.washington.edu/>
- 19 8. UC Davis Genome Center. Available from:  
20 <https://dnatech.genomecenter.ucdavis.edu/prices/>
- 21 9. Nanopore tech. Available from: <https://nanoporetech.com/products/comparison/>
- 22 10. Cho YS, Kim H, Kim HM, Jho S, Jun JH, Lee YJ, et al. Corrigendum: An ethnically  
23 relevant consensus Korean reference genome is a step towards personal reference  
24 genomes. Nat Commun [Internet]. 2017;8:16168.

- 1 11. Bolger AM, Lohse M, Usadel B. Trimmomatic: A flexible trimmer for Illumina  
2 sequence data. *Bioinformatics* [Internet]. 2014;30:2114–20
- 3 12. Porechop, adapter trimmer for Oxford Nanopore reads.  
4 <https://github.com/rrwick/Porechop>
- 5 13. Ruan J, Li H. Fast and accurate long-read assembly with wtdbg2. *bioRxiv* [Internet].  
6 2019;530972.
- 7 14. Racon, ultrafast consensus module for raw de novo genome assembly of long  
8 uncorrected reads. <https://github.com/isovic/racon>
- 9 15. Walker BJ, Abeel T, Shea T, Priest M, Abouelliel A, Sakthikumar S, et al. Pilon: An  
10 integrated tool for comprehensive microbial variant detection and genome assembly  
11 improvement. *PLoS One* [Internet]. 2014;9.
- 12 16. Simão FA, Waterhouse RM, Ioannidis P, Kriventseva E V., Zdobnov EM. BUSCO:  
13 Assessing genome assembly and annotation completeness with single-copy orthologs.  
14 *Bioinformatics* [Internet]. 2015;31:3210–2.
- 15 17. Ghurye J, Pop M, Koren S, Bickhart D, Chin CS. Scaffolding of long read assemblies  
16 using long range contact information. *BMC Genomics* [Internet]. *BMC Genomics*;  
17 2017;18:1–11.
- 18 18. BBMap, short read aligner and other bioinformatics tools.  
19 <https://sourceforge.net/projects/bbmap/>
- 20 19. Pomoxis, bioinformatics tools for nanopore research.  
21 <https://nanoporetech.github.io/pomoxis/>

22

1 **Table 1. Statistics of raw sequenced reads**

|                              | ONT PromethION R9.4.1 |                 | PacBio Sequel  |                 | Short read          |
|------------------------------|-----------------------|-----------------|----------------|-----------------|---------------------|
|                              | 27×                   | 64×             | 30×            | 62×             | Illumina HiSeq 2000 |
| <b>Number of reads</b>       | 15,004,723            | 47,591,997      | 11,195,434     | 20,683,965      | 1,433,779,680       |
| <b>Total length of reads</b> | 80,770,821,288        | 193,027,803,978 | 92,229,416,062 | 187,914,740,184 | 144,811,747,680     |
| <b>N50</b>                   | 12,736                | 9,190           | 13,426         | 14,568          | 101                 |
| <b>Max contig length</b>     | 774,322               | 1,160,324       | 65,865         | 169,910         | 101                 |

2

3

4

5

6

7

8

9

10

11

12

1 **Table 2.** Statistics of KOREF genome assemblies using ONT PromethION and PacBio Sequel sequencing

|                                     | ONT PromethION R9.4.1 |                |                        |                        | PacBio Sequel |               |                        |                        |
|-------------------------------------|-----------------------|----------------|------------------------|------------------------|---------------|---------------|------------------------|------------------------|
|                                     | 27× assembly*         | 64× assembly** | 27× assembly with Hi-C | 64× assembly with Hi-C | 30× assembly  | 62× assembly  | 30× assembly with Hi-C | 62× assembly with Hi-C |
| <b>Contigs / Scaffolds No.</b>      | 3,262                 | 3,725          | 2,313                  | 3,179                  | 2,443         | 2,695         | 1,476                  | 2,139                  |
| <b>Total length</b>                 | 2,757,297,803         | 2,827,624,042  | 2,757,776,303          | 2,827,900,542          | 2,800,962,512 | 2,815,311,932 | 2,801,450,512          | 2,815,594,432          |
| <b>Scaffold N50</b>                 | 7,655,153             | 16,706,773     | 32,758,624             | 56,457,651             | 11,137,362    | 17,931,968    | 38,113,117             | 59,361,327             |
| <b>Max contig / scaffold length</b> | 60,569,695            | 88,903,341     | 120,666,262            | 175,227,974            | 50,101,007    | 77,816,513    | 126,818,544            | 174,360,016            |
| <b>Gap</b>                          | 0.00%                 | 0.00%          | 0.02%                  | 0.01%                  | 0.00%         | 0.00%         | 0.02%                  | 0.01%                  |
| <b>GC content</b>                   | 40.82%                | 40.81%         | 40.82%                 | 40.81%                 | 40.90%        | 40.92%        | 40.90%                 | 40.90%                 |

2

1 **Table 3.** Statistics of KOREF genome assembly assessment using BUSCO and accuracy comparison

| BUSCO assessment                | ONT PromethION R9.4.1 |              |                        |                        | PacBio Sequel |              |                       |                        |
|---------------------------------|-----------------------|--------------|------------------------|------------------------|---------------|--------------|-----------------------|------------------------|
|                                 | 27× assembly          | 64× assembly | 27× assembly with Hi-C | 64× assembly with Hi-C | 30× assembly  | 62× assembly | 30×assembly with Hi-C | 62× assembly with Hi-C |
| <b>Complete</b>                 | 92.5%                 | 92.7%        | 92.6%                  | 94.0%                  | 93.8%         | 93.9%        | 93.8%                 | 93.5%                  |
| <b>Complete and single-copy</b> | 91.8%                 | 91.6%        | 91.9%                  | 93.2%                  | 93.0%         | 93.1%        | 93.0%                 | 92.7%                  |
| <b>Complete and duplicated</b>  | 0.7%                  | 1.1%         | 0.7%                   | 0.8%                   | 0.8%          | 0.8%         | 0.8%                  | 0.8%                   |
| <b>Fragmented</b>               | 3.1%                  | 3.7%         | 3.2%                   | 3.1%                   | 3.0%          | 2.9%         | 3.0%                  | 3.1%                   |
| <b>Missing</b>                  | 4.4%                  | 3.6%         | 4.2%                   | 2.9%                   | 3.2%          | 3.2%         | 3.2%                  | 3.4%                   |
| <b>Accuracy comparison*</b>     | 99.78%                | 99.73%       | 99.78%                 | 99.73%                 | 99.83%        | 99.79%       | 99.86%                | 99.80%                 |

\* Compared with KOREF\_S, the single assembly of KOREF

2

1 **Figure 1**

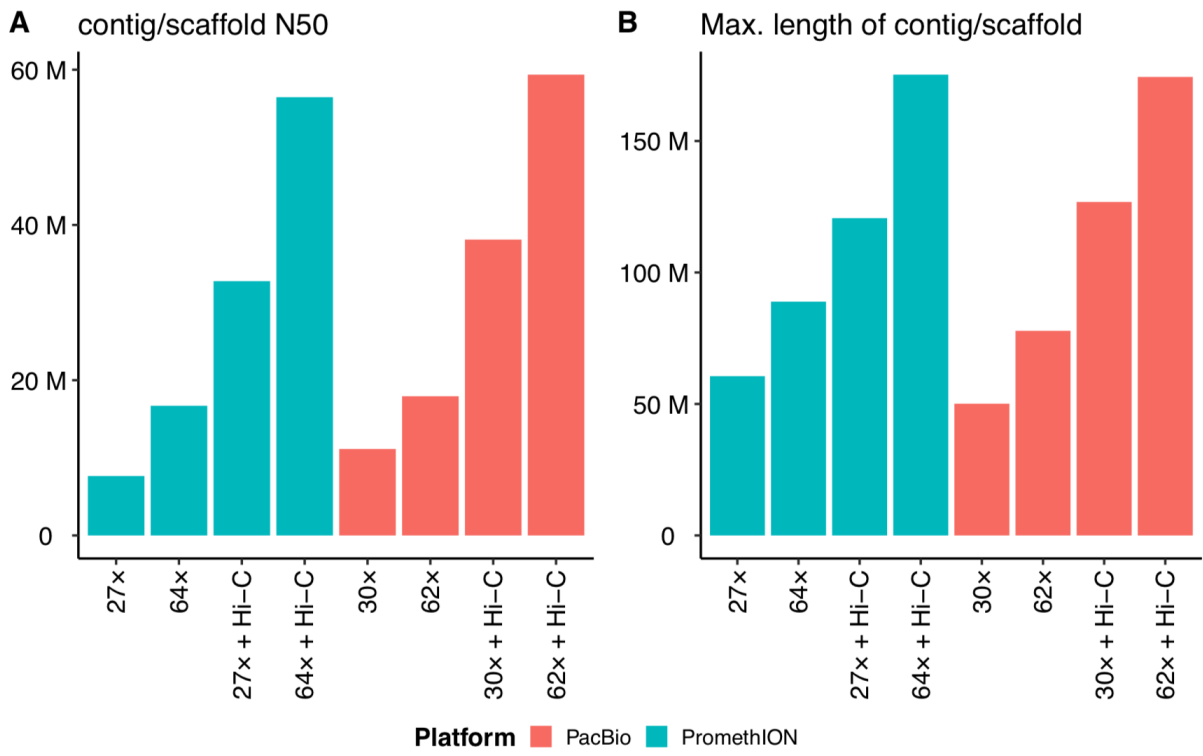

2

3
